# Supplementary material
Source: MDPI journal article supplement (https://www.mdpi.com/2311-5637/7/3/164)
Supplement: s1 [file s1 › fermentation-1350440-supplementary.pdf]

**Table S1.** Residual sugars at 45 and 60 g/L of produced CO<sub>2</sub>.

|        |        | Glucose (g/L) | Fructose (g/L) | Total sugar residue (g/L) |
|--------|--------|---------------|----------------|---------------------------|
| 45 g/L | EC1118 | 31.03±2.22    | 47.10±2.36     | 78.13±4.58 <sup>A</sup>   |
|        | P301.9 | 26.76±2.08    | 53.20±2.05     | 79.96±4.14 <sup>A</sup>   |
|        | R31.3  | 26.63±3.32    | 53.90±3.51     | 80.53±6.83 <sup>A</sup>   |
|        | R008   | 27.21±0.64    | 52.95±1.79     | 80.16±2.40 <sup>A</sup>   |
| 60 g/L | EC1118 | 11.77±1.37    | 23.71±1.90     | 35.48±3.26 <sup>A</sup>   |
|        | P301.9 | 9.58±1.86     | 31.25±2.47     | 40.83±4.31 <sup>A</sup>   |
|        | R31.3  | 8.36±2.03     | 31.56±3.46     | 39.92±5.49 <sup>A</sup>   |
|        | R008   | 11.83±2.34    | 35.13±3.66     | 49.96±5.95 <sup>A</sup>   |

Letters indicate significant differences in the gene expression values obtained from ANOVA analysis of variance followed by Tuckey *post-hoc* test between the strains, at 45 or 60 g/L of CO<sub>2</sub>.
